# Supplementary material
Source: PubMed Central journal article supplement (PMC5061135)
Supplement: NIHMS820726-supplement-Supplemental.pdf [file NIHMS820726-supplement-Supplemental.pdf]

## Supporting Information

### **Indium-based and iodine-based labeling of HPMA copolymer–epirubicin conjugates: Impact of structure on in vivo fate**

Libin Zhang<sup>a</sup>, Rui Zhang<sup>a</sup>, Jiyuan Yang<sup>a</sup>, Jiawei Wang<sup>a</sup>, Jindřich Kopeček<sup>a,b,\*</sup>

<sup>a</sup>Department of Pharmaceutics and Pharmaceutical Chemistry/CCCD, University of Utah, Salt Lake City, UT 84112, USA, <sup>b</sup>Department of Bioengineering, University of Utah, Salt Lake City, UT 84112, USA

\* Corresponding author: Jindřich Kopeček, Center for Controlled Chemical Delivery, 20 S 2030 E, BPRB 205B, University of Utah, Salt Lake City, UT 84112-9452, USA. Phone: (801) 581-7211; Fax: (801) 581-7848.

*E-mail address:* [jjindrich.kopecek@utah.edu](mailto:jjindrich.kopecek@utah.edu) (J. Kopeček)

## Table of Content

|                                                                                            |                   |
|--------------------------------------------------------------------------------------------|-------------------|
| I. Synthesis schemes                                                                       |                   |
| 1. <i>Synthesis of Tyr-C<math>\equiv</math>CH</i>                                          | <i>(Fig. S1)</i>  |
| 2. <i>Synthesis of MA-GFLG-Abu(N<sub>3</sub>)-EPI and MA-GFLG-Abu(Tyr)-EPI</i>             | <i>(Fig. S2)</i>  |
| 3. <i>Synthesis of CTA-GFLG-CTA</i>                                                        | <i>(Fig. S3)</i>  |
| 4. <i>Synthesis of conjugates P-EPI and P-EPI(Tyr)</i>                                     | <i>(Fig. S4)</i>  |
| 5. <i>Synthesis of conjugates P-DTPA</i>                                                   | <i>(Fig. S5)</i>  |
| 6. <i>Synthesis of 1<sup>st</sup> generation conjugate P-DTPA-EPI(Tyr)</i>                 | <i>(Fig. S6)</i>  |
| II. Characterization of monomers, RAFT agent and conjugates                                |                   |
| 1. HPLC (left) and MALDI-TOF-MS (right) analysis of MA-GFLG-Abu(N <sub>3</sub> )-EPI       | <i>(Fig. S7)</i>  |
| 2. HPLC (left) and MALDI-TOF-MS (right) analysis of MA-GFLG-Abu(Tyr)-EPI                   | <i>(Fig. S8)</i>  |
| 3. HPLC (left) and MALDI-TOF-MS (right) analysis of CTA-GFLG-CTA                           | <i>(Fig. S9)</i>  |
| 4. FPLC analysis and characterization of copolymer conjugates P-EPI, P-EPI(Tyr) and P-DTPA | <i>(Fig. S10)</i> |
| 5. Standard curves for determination of amine and epirubicin content                       | <i>(Fig. S11)</i> |
| 6. Standard curve for determination of DTPA content                                        | <i>(Fig. S12)</i> |
| III. Papain cleavage                                                                       | <i>(Fig. S13)</i> |
| IV. Tritosomes cleavage                                                                    | <i>(Fig. S14)</i> |
| V. Tumor-to-tissue uptake ratios                                                           | <i>(Fig. S15)</i> |

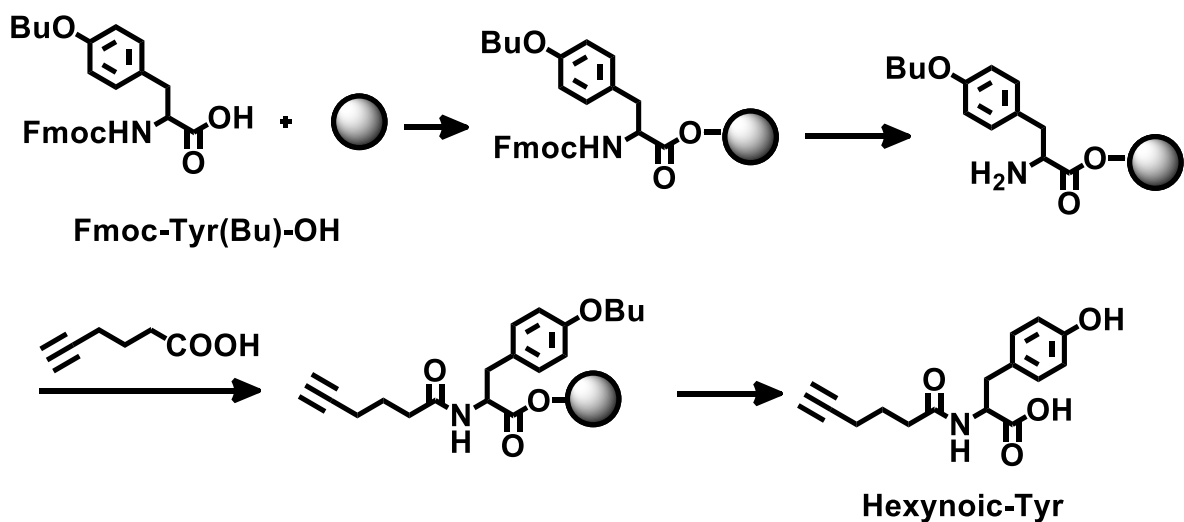

Fig. S1. Synthesis of Hexynoic-Tyr.

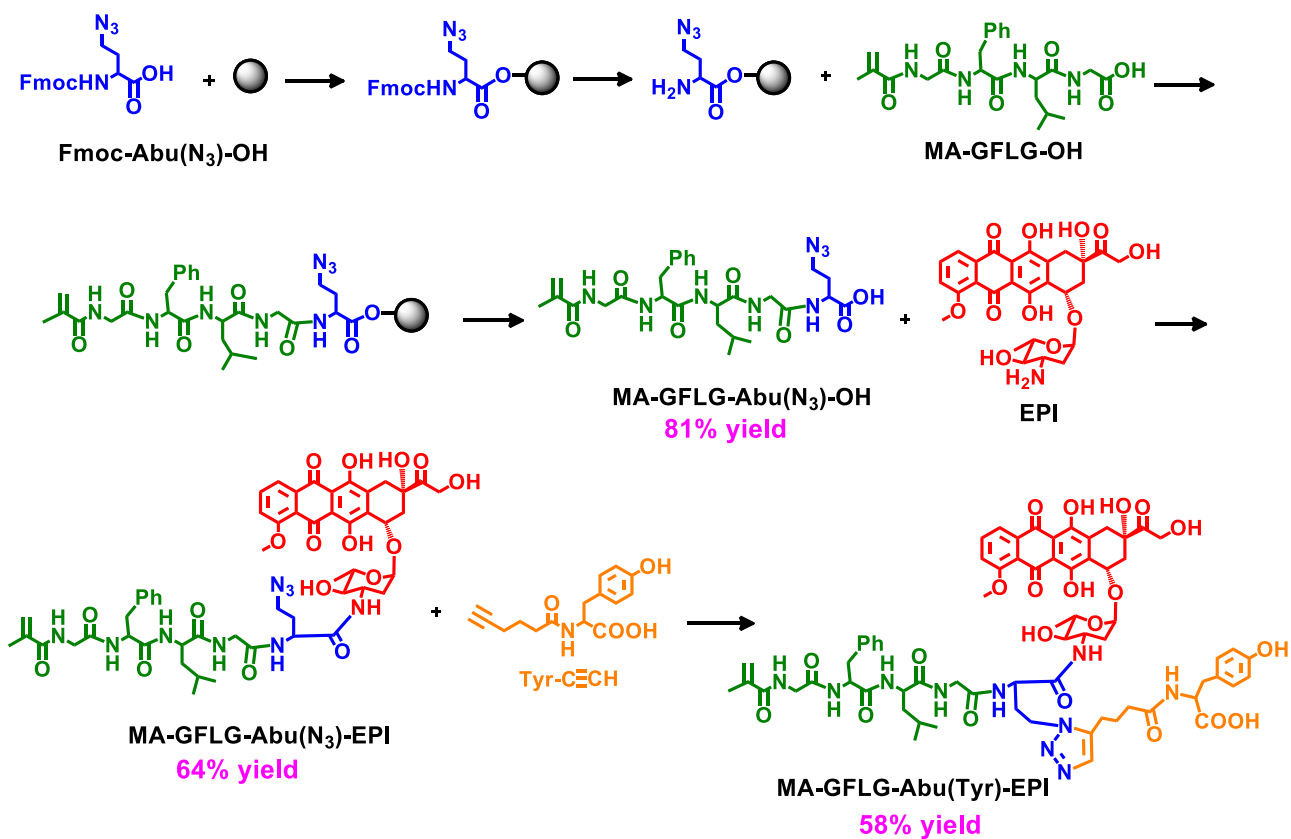

Fig. S2. Synthesis of MA-GFLG-Abu(N<sub>3</sub>)-EPI and MA-GFLG-Abu(Tyr)-EPI.

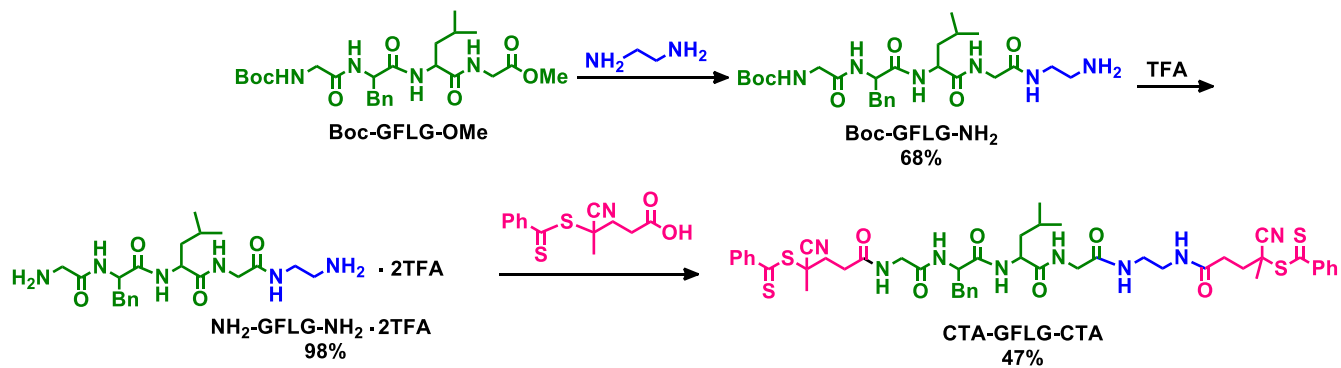

Fig. S3. Synthesis of CTA-GFLG-CTA.

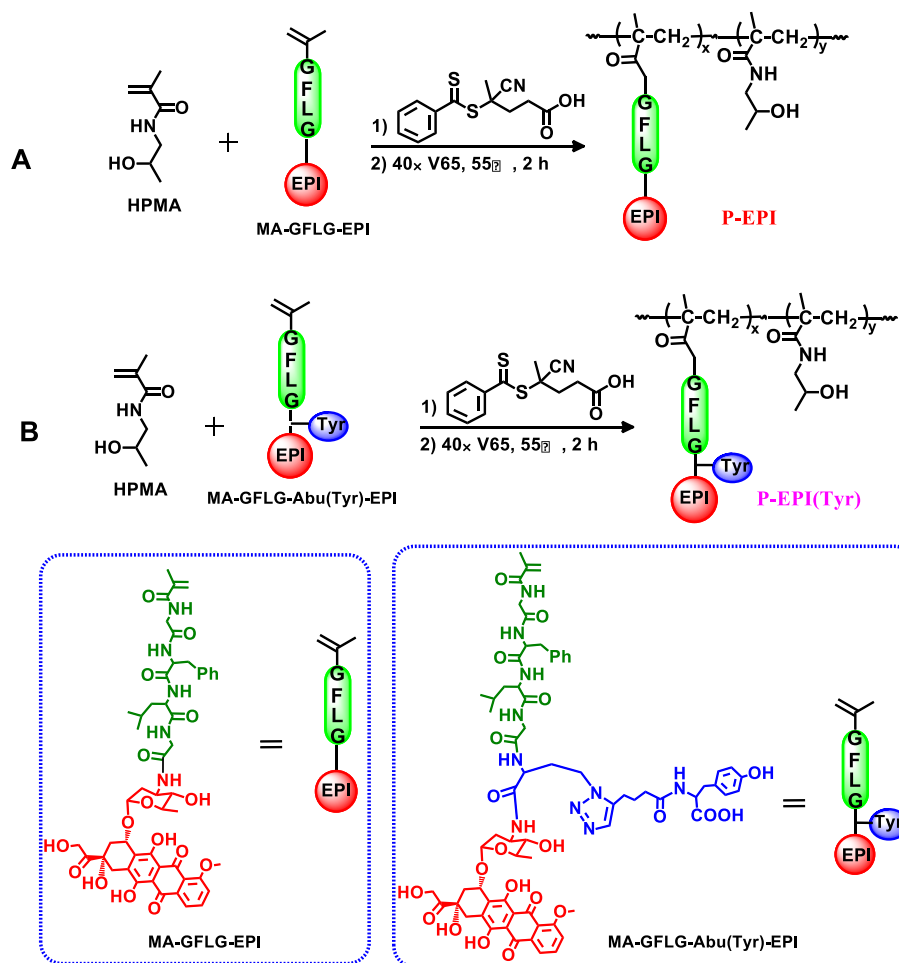

Fig. S4. Synthesis of conjugates P-EPI and P-EPI(Tyr).

## Synthesis of P-DTPA

An ampoule containing 80 mg of HPMA, 4 mg of MA-GG-EPI and 10 mg of MA-GFLG-NHBoc was attached to the Schlenk-line. After three vacuum-nitrogen cycles to remove oxygen, 60  $\mu\text{L}$  degassed MeOH was added and stirred at room temperature. CTA (2 mg/mL  $\times$  115  $\mu\text{L}$ ) in degassed MeOH and 2 mg/mL  $\times$  43  $\mu\text{L}$  of VA-044 in degassed MeOH were added via syringe under magnetic stirring and bubbled with  $\text{N}_2$  for 10 min in ice bath. The ampoule was sealed, and polymerization was performed at 44  $^\circ\text{C}$  for 22 h. The copolymer was obtained by precipitation into acetone/ethyl ether (3:1) and purified by redissolving in methanol and precipitation in acetone/ethyl ether (3:1) two more times. The copolymer was isolated as red powder and dried under vacuum. Yield: 33 mg of P-EPI-NHBoc (34%). After end-modification with 40-times excess of V-65, 33 mg of copolymer P-EPI-NHBoc was dissolved in 500  $\mu\text{L}$   $\text{H}_2\text{O}$  and added 500  $\mu\text{L}$  TFA. The mixture was stirred in ice for 30 min. After removing the solvent, 31 mg red powder was obtained by precipitation into acetone/ethyl ether (3:1). The red powder (31 mg) was dissolved in 600  $\mu\text{L}$   $\text{NaHCO}_3$  (0.2 M) buffer containing 10 mM EDTA (pH 8.5), then mixed with *p*-SCN-Bn-DTPA (10 mg) in 200  $\mu\text{L}$  DMSO. After stirring at room temperature overnight, the sample was applied to a pre-equilibrated PD-10 Sephadex G25 column (GE Healthcare) with DI  $\text{H}_2\text{O}$  for primary purification. The fraction of 2.5–4.5 mL was collected and further purified by ultrafiltration (30,000 Da cut-off) with  $\text{NaHCO}_3$  buffer three times and DI  $\text{H}_2\text{O}$  three times. The final product in DI  $\text{H}_2\text{O}$  was freeze dried to remove solvent (8.5 mg, 26%). DTPA and EPI contents of the copolymer were determined spectrophotometrically as 49 and 19 nmol/mg polymer, respectively.

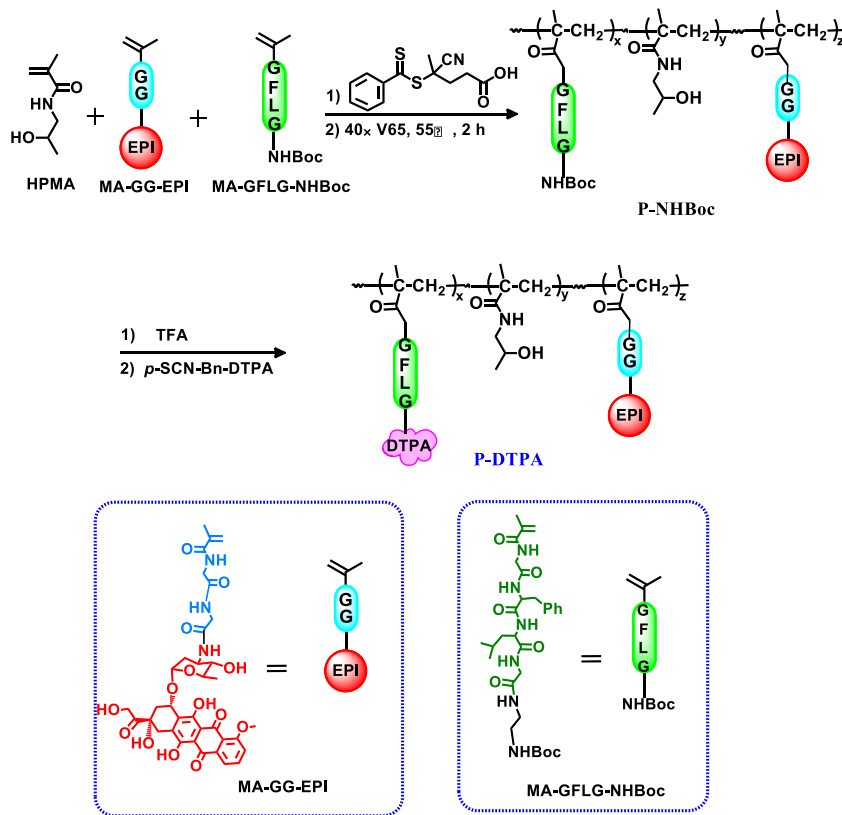

Fig. S5. Synthesis of conjugate P-DTPA.

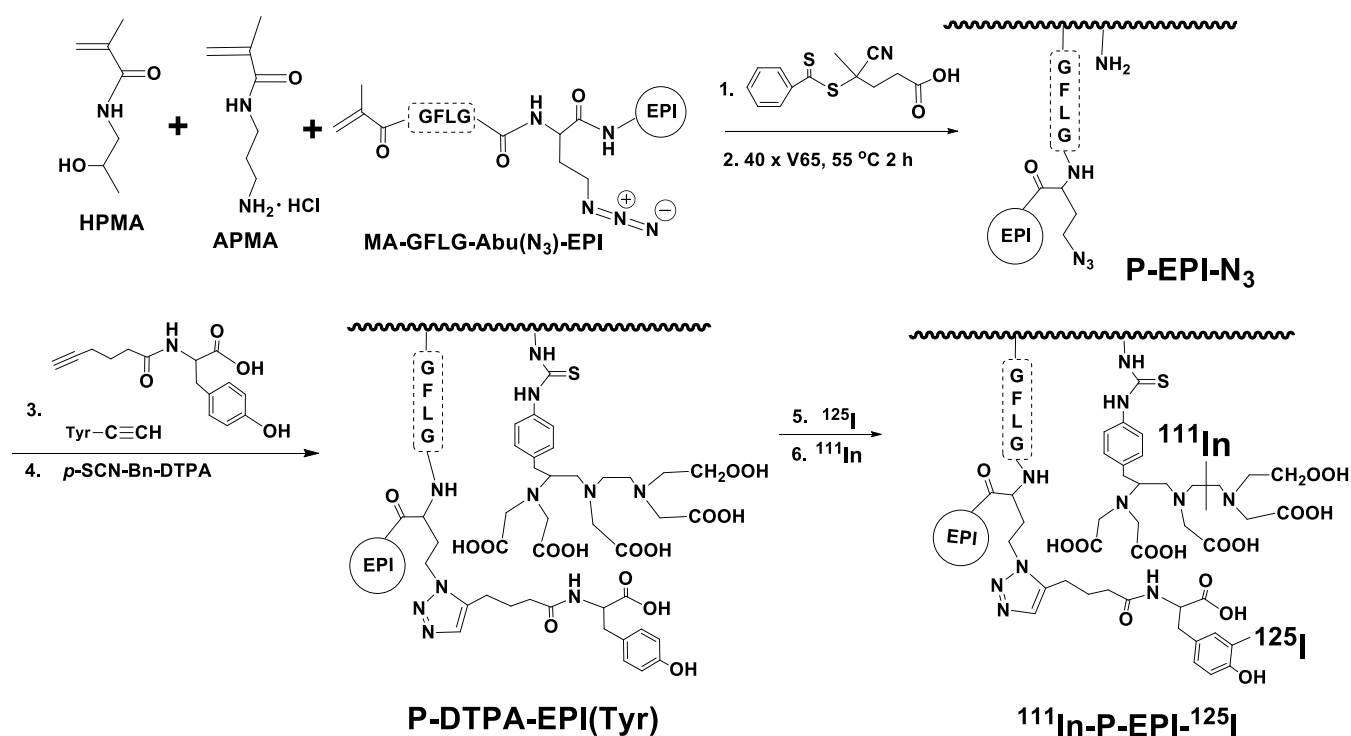

**Fig. S6.** Synthesis of 1<sup>st</sup> generation conjugate P-DTPA-EPI(Tyr) by copolymerization of MA-GFLG-Abu(N<sub>3</sub>)-EPI with HPMA and APMA. Tyrosine residue was incorporated via Cu(I) assisted alkyne-azide click reaction. DTPA was attached to backbone via pendent amino group modification with p-SCN-Bn-DTPA. The polymer precursor was then labeled with <sup>125</sup>I and <sup>111</sup>In, consecutively.

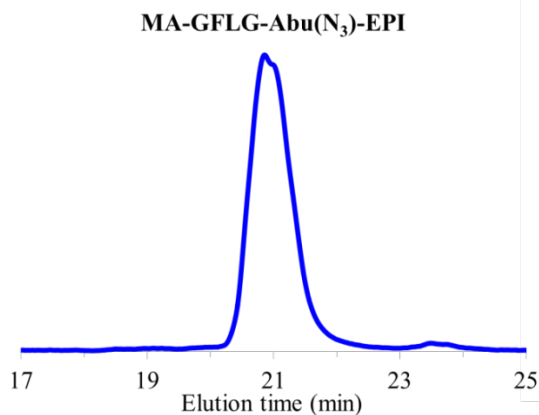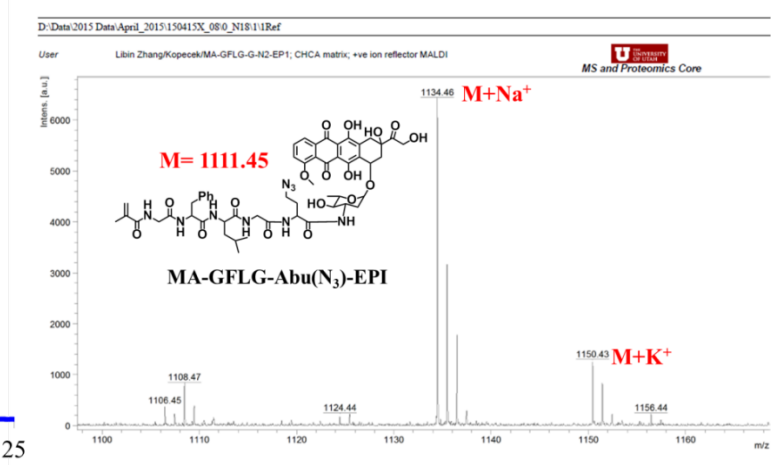

**Fig. S7.** HPLC (left) and MALDI-TOF-MS (right) analysis of MA-GFLG-Abu(N<sub>3</sub>)-EPI.

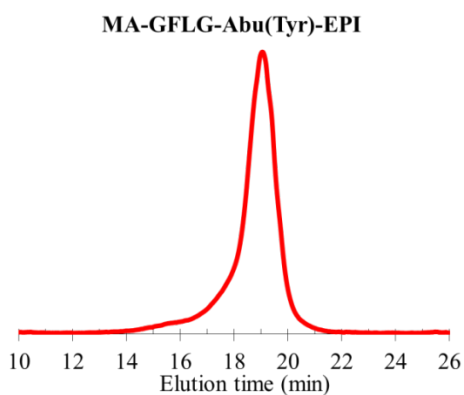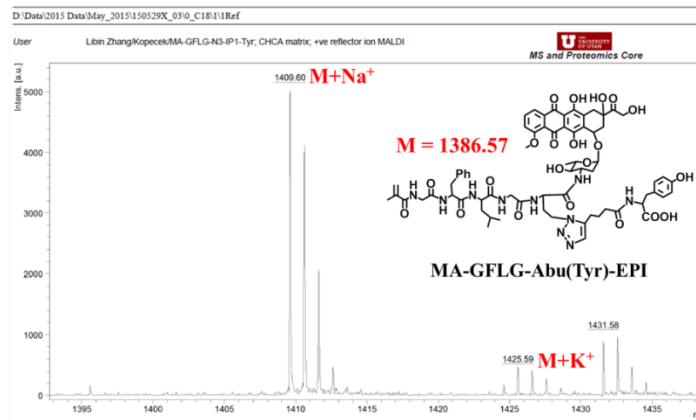

**Fig. S8.** HPLC (left) and MALDI-TOF-MS (right) analysis of MA-GFLG-Abu(Tyr)-EPI.

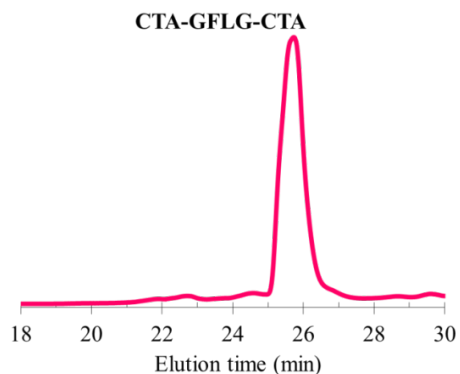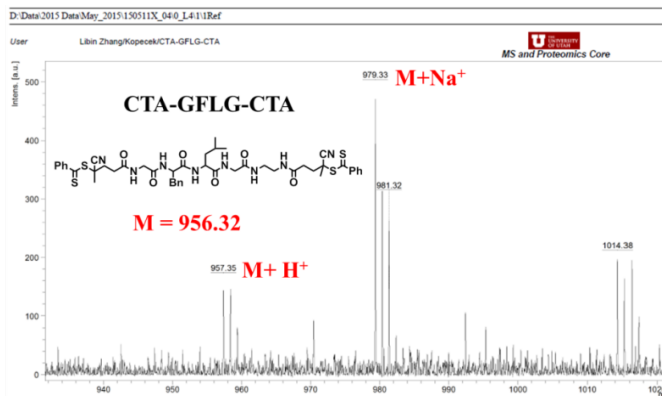

**Fig. S9.** HPLC (left) and MALDI-TOF-MS (right) analysis of CTA-GFLG-CTA.

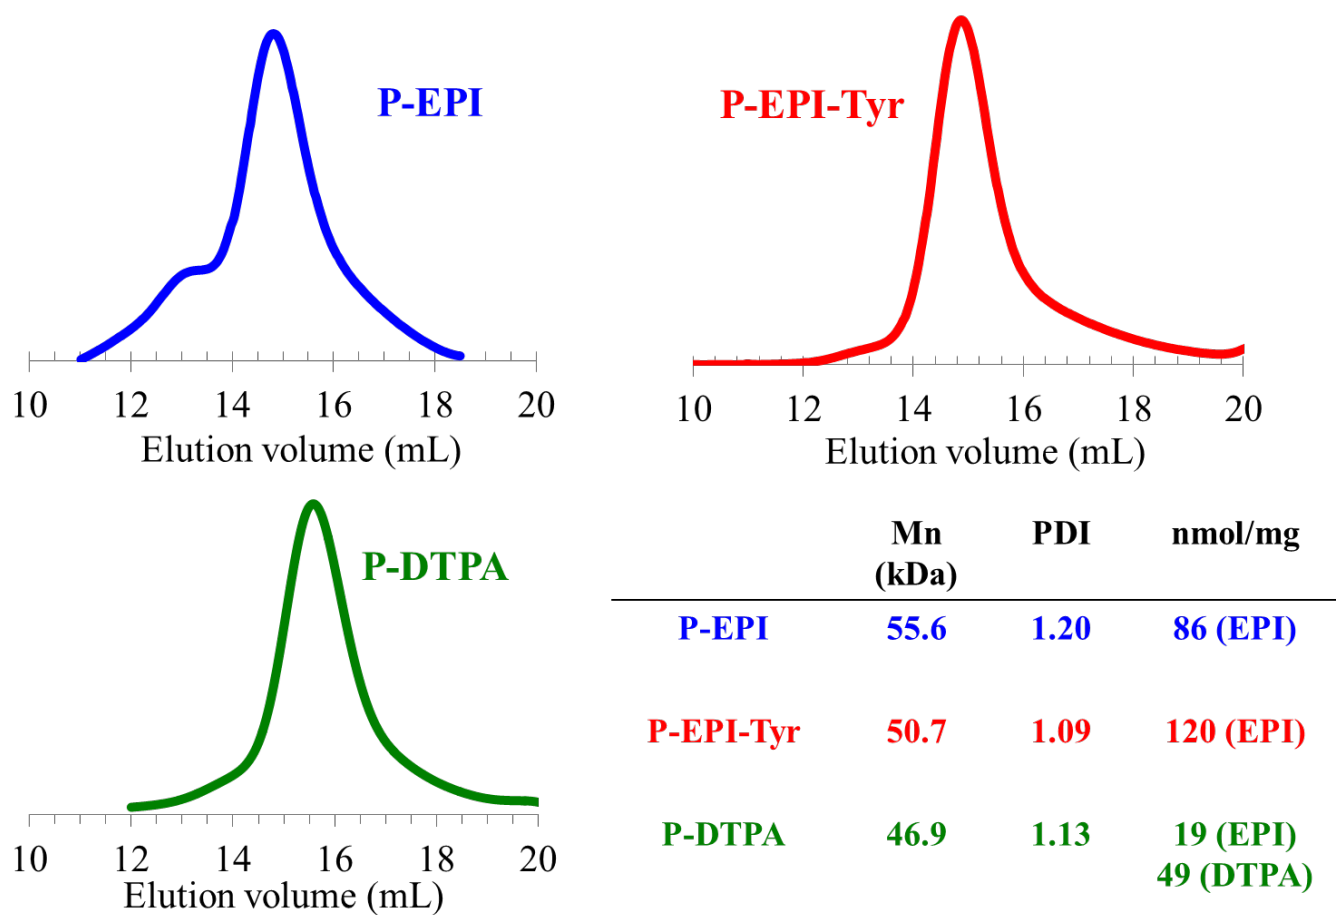

**Fig. S10.** FPLC analysis and characterization of copolymer conjugates P-EPI (blue) and P-EPI(Tyr) (red).

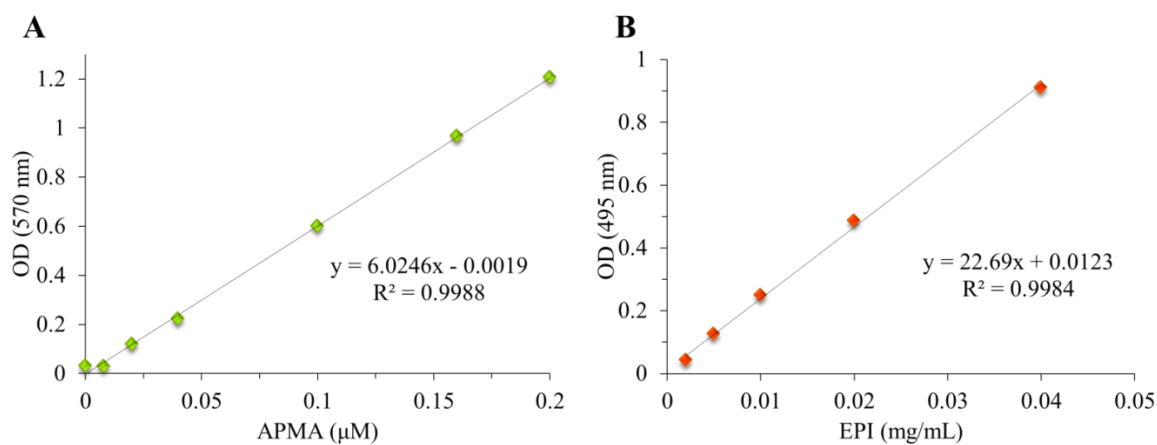

**Fig. S11.** APMA standard curve for ninhydrin assay (A), and EPI standard working curve (B).



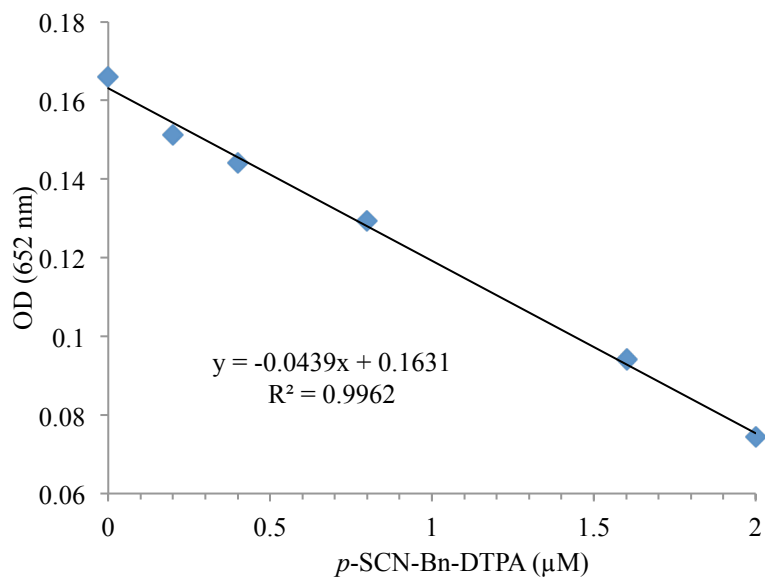

**Fig. S12.** Relationship between the absorbance of the yttrium complex of arsenazo III at 652 nm and the molarity of *p*-SCN-Bn-DTPA.

### Cleavage of P-DTPA-EPI(Tyr) and 2P-DTPA-EPI(Tyr) by papain

Glutathione (35.5 mg/mL × 16.8 μL) in McIlvaine's buffer (50 mM citrate/0.1 M phosphate, pH 6.0) was added to a papain solution (1.68 mg in 168 μL McIlvaine's buffer) and activated at 37 °C for 5 min. P-DTPA-EPI(Tyr) (0.95 mg) or 2P-DTPA-EPI(Tyr) (0.7 mg) was added into a 1.5 mL tube followed by adding 60 μL of papain solution and incubated at 37 °C. After 4 h, 140 μL EtOH was added and the mixture was centrifuged for 5 min (13 000 rpm). The supernatant was analyzed by HPLC at 495 nm detection.

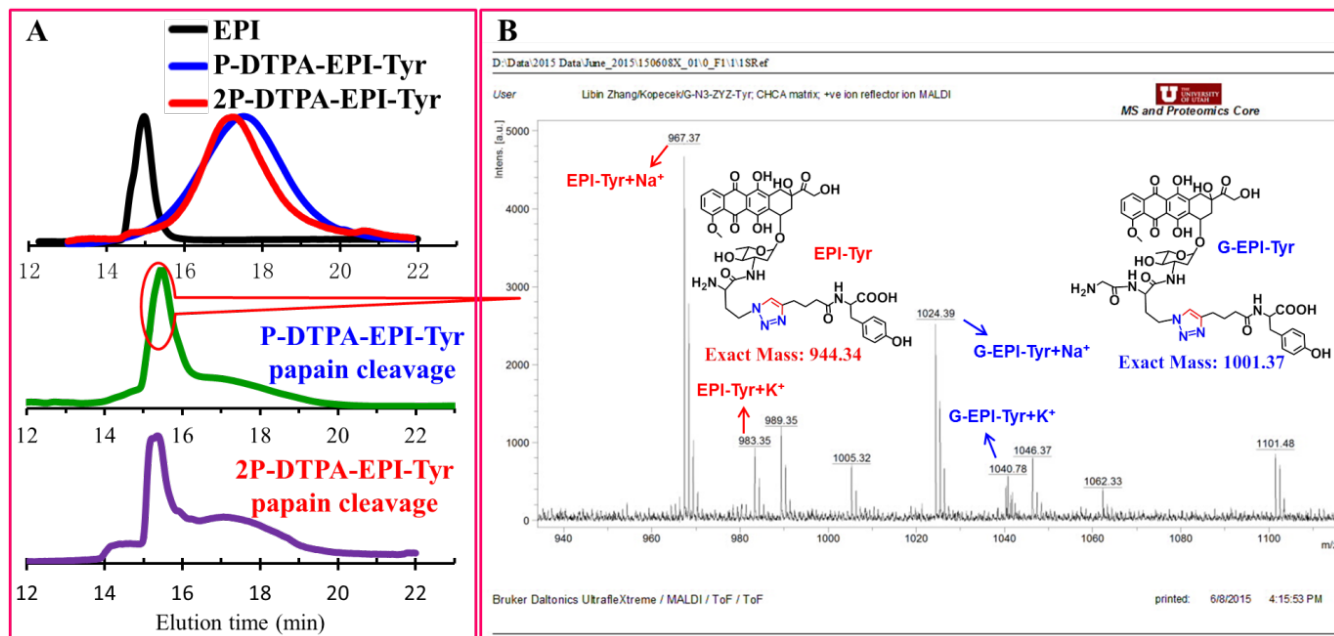

**Fig. S13.** (A) 1<sup>st</sup> and 2<sup>nd</sup> generation conjugates P-DTPA-EPI(Tyr) (0.95 mg) and 2P-DTPA-EPI(Tyr) (0.7 mg) were exposed to model enzyme papain solution (10 mg/mL × 168 μL). After incubation at 37 °C for 4 h, the reaction mixture was analyzed by HPLC which showed that the conjugate P-DTPA-EPI(Tyr) wide peak at 17.4 min almost disappeared accompanied by the emergence of a new peak at 15.5 min corresponding to cleavage product. (B) MALDI-TOF-MS analysis of the new peak showed that papain cleavage of the conjugate yielded two products of glycine-EPI-Tyr ([G-EPI-Tyr+Na]<sup>+</sup>, 1024.39) and EPI-Tyr ([EPI-Tyr+Na]<sup>+</sup>, 967.37). The results indicated that tyrosine moiety was still coupled with EPI after cleavage from P-DTPA-EPI(Tyr) by papain. Papain cleavage products of 2<sup>nd</sup> generation conjugate 2P-DTPA-EPI(Tyr) were the same as 1<sup>st</sup> generation conjugate P-DTPA-EPI-Tyr with a little slower cleavage rate.

### Cleavage of P-DTPA by Tritosomes

For Tritosomes cleavage of P-DTPA, the low molecular weight products in reaction mixture were removed by ultrafiltration (10,000 Da cut-off) with DI H<sub>2</sub>O four times. The supernatant of copolymer was analyzed using working curves (Figs. S11B and S12) to calculate the ratio of DTPA/EPI of the samples. In P-DTPA, EPI bound via nondegradable GG spacer was used as internal standard; release of DTPA resulted in the change of the DTPA/EPI ratio. The initial DTPA/EPI ratio of P-DTPA was considered as 100% before Tritosomes cleavage. From the change in the DTPA/EPI ratio the cleavage percent rate was calculated. Time intervals: 1 min, 1, 2, 4, 6, 8, 23, and 48 h.

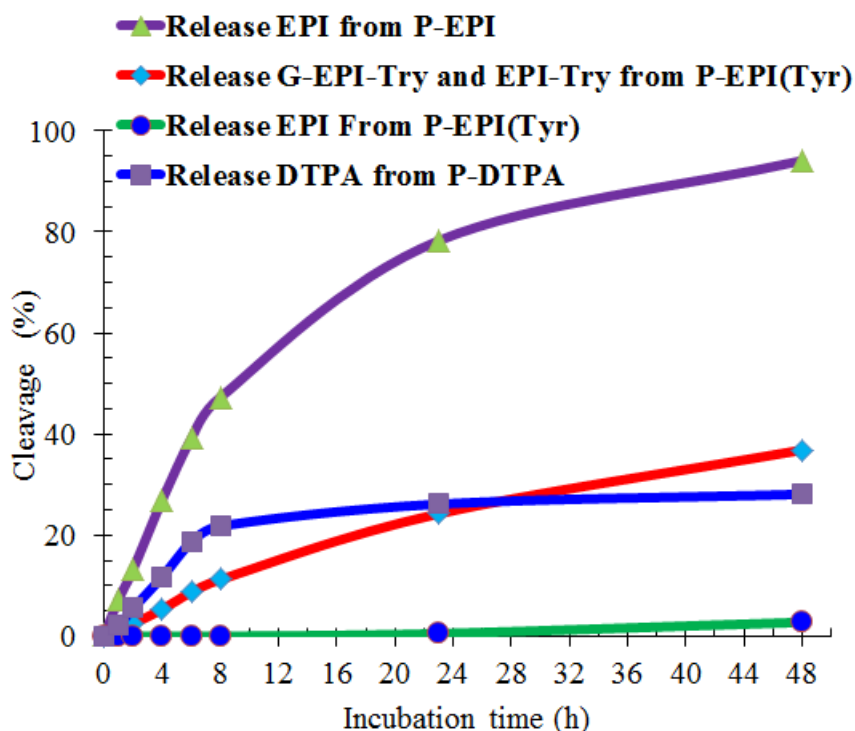

**Fig. S14.** Time profile of P-EPI(Tyr), P-EPI and P-DTPA cleavage by Tritosomes: Purple line – release of EPI from P-EPI; red line – release of Gly-EPI-Tyr + EPI-Tyr from P-EPI(Tyr); green line – release of unmodified EPI from P-EPI(Tyr); blue line – release of DTPA from P-DTPA. Tritosomes (480  $\mu$ L) were incubated with conjugates (3.5 mg P-EPI, 2.5 mg P-EPI(Tyr) or 6.1 mg P-DTPA, 300 nmol substrate in each conjugate) in 520  $\mu$ L buffer B-GSH (0.04% w/w Triton-X-100) at 37  $^{\circ}$ C. Daunomycin was used as internal standard.

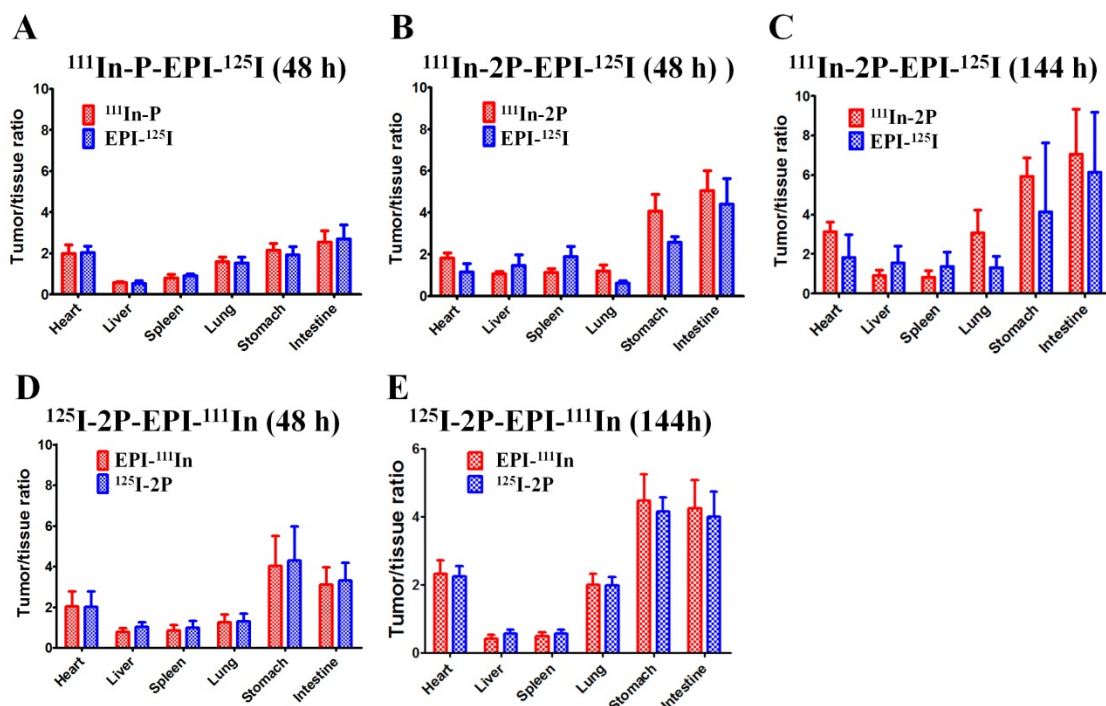

**Fig. S15.** Tumor-to-tissue uptake ratios of polymeric carriers and payload of HPMA copolymer-EPI conjugates in tumor-bearing mice at 48 h or 144 h after i.v. injection. Data obtained using the radioactivity count method plotted as percentage of injected dose per gram of tissue (%ID/g). All the data are expressed as mean  $\pm$  standard deviation (n=5).
